# Supplementary material for: Biopsychosocial Profile of COVID-19 Patients Cared for in Public and Private Health Facilities in Kandahar Province, Afghanistan
Source: Hindawi journal article supplement (doi:10.1155/2023/2669168), 2023-11-16
Supplement: f1 [file 2669168.f1.docx]

**Supplementary Table 1.** Results of independent t-tests and ANOVA of independent variables with the DASS-21 total and subscale scores.docx

|  | | | | | | | | | | | | |
| --- | --- | --- | --- | --- | --- | --- | --- | --- | --- | --- | --- | --- |
|  | **DAS-total** | | | **DAS-depression** | | | **DAS-anxiety** | | | **DAS-stress** | | |
|  | Mean±SD | Test statistics | p | Mean±SD | Test statistics | p | Mean±SD | Test statistics | p | Mean±SD | Test statistics | p |
| ***Age1*** |  | | | | | | | | | | | |
| 18-30 | 43.46±12.35 | F=9.39 | ***<.0001*** | 14.13±4.89 | F=8.98 | ***<.0001*** | 14.76±4.36 | F=7.28 | ***.001*** | 14.57±4.28 | F=7.35 | ***.001*** |
| 31-50 | 47.27±8.60 | 15.81±3.34 | 16.04±3.35 | 15.42±2.97 |  |
| 51-80 | 49.08±9.04 | 16.29±3.47 | 16.62±3.36 | 16.17±2.87 |  |
| ***Gender*** |  | | | | | | | | | | | |
| Female | 49.50±7.52 | t=-4.76 | ***<.0001*** | 16.49±2.96 | t=-4.29 | ***<.0001*** | 16.73±2.99 | t=-3.94 | ***<.0001*** | 16.29±2.58 | t=-4.7 | ***<.0001*** |
| Male | 45.343±10.90 | 15.03±4.29 | 15.46±3.97 | 14.94±3.60 |
| ***Education*** |  | | | | | | | | | | | |
| Educated | 42.89±12.31 | t=-5.02 | ***<.0001*** | 13.85±4.69 | t=-5.48 | ***<.0001*** | 14.61±4.45 | t=-4.48 | ***<.0001*** | 14.44±4.09 | t=-3.85 | ***<.0001*** |
| Uneducated | 48.95±7.97 | 16.38±3.17 | 16.58±3.08 | 15.99±2.75 |
| ***Comorbid medical diseases*** |  | | | | | | | | | | | |
| Yes | 49.28±8.08 | t=3.56 | ***<.0001*** | 16.37±3.27 | t=2.99 | ***.003*** | 16.74±3.17 | t=3.22 | ***.001*** | 16.17±2.66 | t=3.30 | ***.001*** |
| No | 46.27±10.29 | 15.36±  4.01 | 15.67±3.75 | 15.24±3.47 |
| ***Marital status2*** |  |  |  |  |  |  |  |  |  |  |  |  |
| Unmarried | 44.80±7.1 | F=3.71 | ***.025*** | 15.6±2.53 | F=2.01 | ***.134*** | 14.33±2.69 | F=3.67 | ***.026*** | 14.87±2.90 | F=4.94 | ***.007*** |
| Married | 46.99±10.21 | 15.59±3.96 | 15.99±3.79 | 15.41±3.40 |
| Separated | 49.83±6.33 | 16.48±2.9 | 16.79±2.40 | 16.55±2.04 |
| ***ICU required*** |  | | | | | | | | | | | |
| Yes | 53.49±8.02 | t=3.91 | ***<.0001*** | 17.8±2.83 | t=3.42 | ***.001*** | 18.31±2.73 | t=3.88 | ***<.0001*** | 17.34±3.21 | t=3.36 | ***.001*** |
| No | 48.16±8.51 | 15.6±3.78 | 15.91±3.57 | 15.46±3.17 |
| ***Age*** |  | r=.16 | ***<.0001*** |  | r=.14 | ***.001*** |  | r=.14 | ***.001*** |  | r=.14 | ***.002*** |
| ***Social support*** |  | r=.44 | ***<.0001*** |  | r=.40 | ***<.0001*** |  | r=.34 | ***<.0001*** |  | r=.47 | ***<.0001*** |
| 1 post-hoc analyses indicated that the scores are higher for those who are in age group 51-80 than those who are in age groups 18-30 and 31-50.  2 post-hoc analyses indicated that the scores are higher for those who are separated than those who are married and unmarried. | | | | | | | | | | | | |
